# Supplementary material for: Characterisation and Validation of Insertions and Deletions in 173 Patient Exomes
Source: PLoS One. 2012 Dec 14;7(12):e51292. doi: 10.1371/journal.pone.0051292 (PMC3522676; doi:10.1371/journal.pone.0051292)
Supplement: Table S1 — INDELs counts. The table summarises the average counts (and standard deviation) of each consequence per category of dataset. Our calls have been divided among those already described in ENSEMBL, those described only in the latest release of 1000 Genome and those that are novel. The table reports the counts for the annotation of the variants available in ENSEMBL and positioned in our capture regions, the same annotation for the variants released by 1000 Genome and the comparison between our analysis of 1000 Genome data and our dataset. (XLSX) [file pone.0051292.s004.xlsx]

## Sheet: Sheet1
	Small Insertion / Deletions
		ensembl	1000 Genome data release	1000 genome re-analysed described in ENSEMBL (standard dev.)	1000 genome re-analysed described in 1000 Genome only (standard dev.)	1000 genome re-analysed novel (standard dev.)	our data described in ENSEMBL (standard dev.)	our data described in 1000 Genome only (standard dev.)	our data novel (standard dev.)
	ESSENTIAL_SPLICE_SITE	40	16	1.9 (1.58)	0.33 (0.48)	0.38 (na)	5.25 (1.43)	0.34 (0.52)	0.61 (0.84)
	STOP	4	3	0 (0)	0 (0)	0 (na)	0 (0)	0 (0)	0.03 (0.21)
	COMPLEX_INDEL	2	15	2.05 (1.66)	0.24 (0.54)	0.19 (na)	3.13 (1.01)	0.36 (0.52)	0.47 (0.63)
	FRAMESHIFT_CODING	1339	502	32.05 (21.13)	2.29 (2.08)	11.67 (na)	69.4 (7.38)	3.28 (1.73)	23.49 (5.43)
	NON_SYNONYMOUS_CODING	70	307	31.05 (19.48)	1.19 (1.44)	4.24 (na)	68.33 (6.57)	2.24 (1.11)	6.69 (3.19)
	SPLICE_SITE	196	260	48.48 (27.6)	3.29 (2.33)	4.81 (na)	98.42 (7.53)	4.69 (2.01)	7.05 (3)
	5PRIME_UTR	52	57	12 (8.13)	0.05 (0.22)	1.1 (na)	22.78 (3.18)	0.53 (0.64)	1.37 (1.12)
	3PRIME_UTR	52	131	25.1 (16.18)	1.95 (1.77)	1.62 (na)	49.45 (5.3)	3.08 (1.45)	2.33 (1.68)
	INTRONIC	934	1529	306.62 (176.42)	19.33 (10.99)	22.29 (na)	616.76 (32.95)	32.93 (5.55)	37.69 (11.25)
	OTHER	13	18	5.48 (3.94)	0.38 (0.67)	0.76 (na)	12.91 (2.58)	0.36 (0.53)	2.02 (1.32)
	TOTAL SUM	2702	2838	464.71	29.05	47.05	946.42	47.81	81.76
				540.81			1075.99
