# Supplementary material for: Characterisation and Validation of Insertions and Deletions in 173 Patient Exomes
Source: PLoS One. 2012 Dec 14;7(12):e51292. doi: 10.1371/journal.pone.0051292 (PMC3522676; doi:10.1371/journal.pone.0051292)
Supplement: Table S3 — Private INDELs validation. The table lists the INDELs private to single samples, which have been validated in the 11 samples used for validation with Sanger sequencing. The column “nonRef_MAF” reports the frequency of non-reference alleles in our samples, the column “sequence” indicates whether Sanger sequence reported the same sequence as called in NGS data, and the column “latest1000G” indicates if the variant has been called in the release of November 2011 of the 1000 Genome Consortium. (XLSX) [file pone.0051292.s006.xlsx]

## Sheet: Sheet1
dbSNP_name	chromosome	position	known_effect	snv_allele	VALIDATED?	sequence	latest1000G
novel_chr2_65298646	2	65298646	FRAMESHIFT_CODING	AAC/-	NA		.
novel_chr2_152311704	2	152311704	INTRONIC	A/-	YES	identical	no
novel_chr2_229890866	2	229890866	INTRONIC	G/-	YES	identical	no
novel_chr3_113649716	3	113649716	INTRONIC	-/T	YES	identical	no
novel_chr4_142150676	4	142150676	INTRONIC	-/CA	YES	identical	no
novel_chr5_111500755	5	111500755	FRAMESHIFT_CODING	GTT/-	YES	identical	no
novel_chr6_24566967	6	24566967	FRAMESHIFT_CODING	TAT/-	YES	identical	no
novel_chr6_90437541	6	90437541	INTRONIC	G/-	YES	identical	no
novel_chr7_80301320	7	80301320	FRAMESHIFT_CODING	GAA/-	YES	identical	no
novel_chr7_86803994	7	86803994	NON_SYNONYMOUS_CODING	-/G	YES	identical	no
novel_chr8_39463892	8	39463892	ESSENTIAL_SPLICE_SITE	-/T	YES	identical	no
novel_chr9_35662032	9	35662032	INTRONIC	-/T	YES	identical	no
novel_chr10_12046745	10	12046745	INTRONIC	AAGT/-	YES	identical	no
novel_chr11_18637498	11	18637498	FRAMESHIFT_CODING	TCT/-	YES	identical	yes
novel_chr11_64681995	11	64681995	INTRONIC	C/-	YES	identical	no
novel_chr12_112572722	12	112572722	INTRONIC	TGT/-	YES	identical	no
novel_chr13_111532241	13	111532241	FRAMESHIFT_CODING	CTC/-	YES	identical	no
novel_chr15_25584437	15	25584437	INTRONIC	C/-	YES	identical	no
novel_chr17_10305158	17	10305158	INTRONIC	T/-	YES	identical	no
novel_chr17_19290122	17	19290122	FRAMESHIFT_CODING	-/AGC	YES	identical	no
novel_chr19_9524271	19	9524271	FRAMESHIFT_CODING	T/-	YES	identical	no
novel_chr19_36120482	19	36120482	FRAMESHIFT_CODING	CCCACTGTC/-	YES	identical	no
novel_chr19_48260295	19	48260295	3PRIME_UTR	-/A	YES	identical	no
novel_chr21_37711224	21	37711224	FRAMESHIFT_CODING	C/-	YES	identical	no
novel_chr21_37769700	21	37769700	INTRONIC	-/T	YES	identical	no
novel_chr22_46806275	22	46806275	INTRONIC	C/-	YES	identical	yes
novel_chr1_1266820	1	1266820	NON_SYNONYMOUS_CODING	-/G	YES	identical	no
novel_chr6_70637896	6	70637896	NON_SYNONYMOUS_CODING	-/G	NO	NA	no
novel_chr12_59268350	12	59268350	NON_SYNONYMOUS_CODING	-/G	NO	NA	no
novel_chr16_49407828	16	49407828	5PRIME_UTR	-/A	NO	ND	no
novel_chr1_11140906	1	11140906	FRAMESHIFT_CODING	CTT/-	YES	identical	no
novel_chr1_46159100	1	46159100	FRAMESHIFT_CODING	CTAA/-	YES	identical	no
novel_chr1_67592910	1	67592910	FRAMESHIFT_CODING	T/-	YES	identical	no
novel_chr1_85598679	1	85598679	NON_SYNONYMOUS_CODING	-/A	YES	identical	no
novel_chr1_150818770	1	150818770	FRAMESHIFT_CODING	ATC/-	YES	identical	no
novel_chr2_61413835	2	61413835	FRAMESHIFT_CODING	AAG/-	YES	identical	no
novel_chr3_39452540	3	39452540	INTRONIC	T/-	YES	identical	no
novel_chr3_44635660	3	44635660	5PRIME_UTR	ACT/-	YES	identical	no
novel_chr3_67053810	3	67053810	NON_SYNONYMOUS_CODING	-/T	YES	identical	no
novel_chr3_69097386	3	69097386	FRAMESHIFT_CODING	AAG/-	YES	identical	no
novel_chr4_123122146	4	123122146	INTRONIC	TAACA/=	YES	identical	no
novel_chr6_41250509	6	41250509	INTRONIC	-/T	YES	identical	no
novel_chr8_10583753	8	10583753	FRAMESHIFT_CODING	AGA/-	NA		.
novel_chr8_125131813	8	125131813	INTRONIC	-/C	YES	identical	no
novel_chr9_35689085	9	35689085	INTRONIC	-/G	YES	identical	no
novel_chr11_799290	11	799290	3PRIME_UTR	T/-	YES	identical	no
novel_chr11_32781605	11	32781605	INTRONIC	CAAAAT/-	YES	identical	no
novel_chr11_71711614	11	71711614	ESSENTIAL_SPLICE_SITE	AGT/-	YES	identical	no
novel_chr12_33532950	12	33532950	INTRONIC	T/-	YES	identical	no
novel_chr14_93178359	14	93178359	INTRONIC	G/-	YES	identical	no
novel_chr16_19078969	16	19078969	5PRIME_UTR	-/T	YES	identical	no
novel_chr18_6215840	18	6215840	FRAMESHIFT_CODING	AT/-	YES	identical	no
novel_chr19_16243103	19	16243103	FRAMESHIFT_CODING	-/TTC	YES	identical	no
novel_chr19_38893872	19	38893872	SPLICE_SITE	GGTGAGGCT/-	YES	identical	no
novel_chr19_51297127	19	51297127	INTRONIC	-/T	YES	identical	no
novel_chr22_18607090	22	18607090	INTRONIC	GGA/-	YES	identical	no
novel_chrX_119678299	X	119678299	INTRONIC	=/ATCAGCTCTGT	YES	identical	no
novel_chr1_3411313	1	3411313	FRAMESHIFT_CODING	AG/-	YES	identical	no
novel_chr1_35227007	1	35227007	FRAMESHIFT_CODING	TGTC/-	YES	identical	no
novel_chr1_230503757	1	93178359	FRAMESHIFT_CODING	CCACA/-	YES	identical	no
novel_chr1_248059352	1	19078969	FRAMESHIFT_CODING	CTC/-	YES	identical	no
novel_chr2_15542412	2	6215840	FRAMESHIFT_CODING	T/-	YES	identical	no
novel_chr2_33045867	2	16243103	INTRONIC	-/T	YES	identical	no
novel_chr2_37480319	2	38893872	3PRIME_UTR	-/T	YES	identical	no
novel_chr2_107423174	2	51297127	FRAMESHIFT_CODING	C/-	YES	identical	no
novel_chr2_216184407	2	18607090	FRAMESHIFT_CODING	C/-	YES	identical	no
novel_chr3_46759228	3	119678299	FRAMESHIFT_CODING	=/AGC	YES	identical	no
novel_chr3_112714150	3	112714150	INTRONIC	-/C	YES	identical	no
novel_chr4_186382236	4	186382236	NON_SYNONYMOUS_CODING	-/T	YES	identical	no
novel_chr6_135307358	6	135307358	INTRONIC	-/T	YES	identical	no
novel_chr7_83614801	7	83614801	FRAMESHIFT_CODING	G/-	YES	identical	no
novel_chr7_148702958	7	148702958	INTRONIC	C/-	YES	identical	no
novel_chr9_90388153	9	90388153	INTRONIC	G/-	NA		.
novel_chr9_107366904	9	107366904	DOWNSTREAM	AA/-	NA		.
novel_chr11_5172795	11	5172795	NON_SYNONYMOUS_CODING	-/C	YES	identical	no
novel_chr11_8752312	11	8752312	FRAMESHIFT_CODING	CGGCGA/-	YES	identical	no
novel_chr12_20864481	12	20864481	INTRONIC	-/A	YES	identical	no
novel_chr15_29347026	15	29347026	FRAMESHIFT_CODING	C/-	YES	identical	no
novel_chr19_1105839	19	1105839	INTRONIC	GGGGTG/-	NA		.
novel_chr19_51729103	19	51729103	FRAMESHIFT_CODING	CCGG/-	YES	identical	no
novel_chr19_58572905	19	58572905	INTRONIC	-/G	YES	identical	no
novel_chr20_10621923	20	10621923	INTRONIC	-/T	YES	identical	no
